# Supplementary material for: Impaired integrin α5/β1‐mediated hepatocyte growth factor release by stellate cells of the aged liver
Source: PubMed Central journal article supplement (PMC7189994; doi:10.1111/acel.13131), 2020-03-11
Supplement: ACEL-19-e13131-s001.pdf [file ACEL-19-e13131-s001.pdf]

# **Impaired integrin $\alpha_5/\beta_1$ -mediated hepatocyte growth factor release by stellate cells of the aged liver**

Friederike Rohn<sup>1\*</sup>, Claus Kordes<sup>1\*</sup>, Tobias Buschmann<sup>1</sup>, Doreen Reichert<sup>1</sup>, Marianne Wammers<sup>1</sup>, Gereon Poschmann<sup>2</sup>, Kai Stühler<sup>2, 3</sup>, Amelie S. Benk<sup>4,5</sup>, Fania Geiger<sup>4,5</sup>, Joachim P. Spatz<sup>4,5</sup>, Dieter Häussinger<sup>1</sup>

\*These authors contributed equally.

<sup>1</sup>Clinic of Gastroenterology, Hepatology and Infectious Diseases, Heinrich Heine University, Düsseldorf, Germany

<sup>2</sup>Institute for Molecular Medicine, Heinrich Heine University, Düsseldorf, Germany

<sup>3</sup>Molecular Proteomics Laboratory, BMFZ, Heinrich Heine University Düsseldorf, Düsseldorf, Germany

<sup>4</sup>Max-Planck-Institute for Medical Research, Department of Cellular Biophysics, Jahnstraße 29, 69120 Heidelberg, Germany

<sup>5</sup>Department of Biophysical Chemistry, University of Heidelberg, Im Neuenheimer Feld 253, 69120 Heidelberg, Germany

## Supplemental data

**Supplemental Table S1: Differential expression of markers associated with ECM in whole liver tissue from aging rats.** The gene expression in liver tissue from young (2 months) and old (22 months) rat livers was investigated by Affymetrix microrarrays (n = 3 for each group). Negative fold change implicates lower expression in hepatic tissue from old rats ( $p < 0.05$ ). All ECM-associated genes, that were significantly altered in the liver tissue from 22-months-old rats, showed a reduction. Among integrins, only integrin  $\alpha_5$  (*Itga5*) was markedly regulated.

| Process        | Gene Symbol | Fold Change | ANOVA p-value |
|----------------|-------------|-------------|---------------|
| ECM-associated | Lama2       | -1.31       | 0.026214      |
|                | Nid1        | -1.82       | 0.000481      |
|                | Col1a1      | -1.23       | 0.002631      |
|                | Col1a2      | -2.92       | 0.014069      |
|                | Col3a1      | -2.50       | 0.001962      |
|                | Col4a1      | -1.54       | 0.011863      |
|                | Col5a1      | -1.41       | 0.028843      |
|                | Col14a1     | -1.20       | 0.010225      |
|                | Eln         | -1.55       | 0.022032      |
|                | Fn1         | -1.05       | 0.047903      |
| integrins      | Itga1       | -1.09       | 0.026565      |
|                | Itga5       | -1.65       | 0.002914      |
|                | Itga6       | -1.37       | 0.049957      |
|                | Itgb4       | 1.17        | 0.044354      |

## Supplemental Table S2: Matrisome analysis of decellularized rat liver.

(see separate Excel file "Supplemental Table S2")

Two separate tables are given: one table containing all identified proteins and one table containing all quantified proteins. The tables include data from protein identification as was as quantitative data from label-free quantification.

**Supplemental Table S3: Differential expression of markers associated with ECM and integrins in HSC from aging rats.** The gene expression of HSC isolated from young (2 months) and old (22 months) rat livers was investigated by Affymetrix micorarrays (n = 3 for each group). Negative fold change implicates lower expression while positive values indicate higher expression in HSC from old rats (p < 0.05). The expression of *Mmp13* increased markedly on mRNA level in array analysis, whereas matrix proteins such as *Lama2*, *Lamc1*, *Nid1*, *Nid2*, collagens, and *Fn1* decreased in HSC from old rats. Furthermore, several integrins were significantly downregulated such as *Itga5*.

| Process        | Gene Symbol | Fold Change | ANOVA p-value |
|----------------|-------------|-------------|---------------|
| ECM-associated | Mmp2        | -2.68       | 0.004478      |
|                | Mmp28       | -1.67       | 0.004404      |
|                | Mmp17       | 1.21        | 0.029466      |
|                | Mmp16       | 1.24        | 0.025820      |
|                | Mmp3        | 1.74        | 0.000433      |
|                | Mmp11       | 2.37        | 0.001967      |
|                | Mmp13       | 15.38       | 0.000619      |
|                | Lama2       | -3.15       | 0.000760      |
|                | Lamc1       | -1.38       | 0.006252      |
|                | Lama4       | 2.92        | 0.009783      |
|                | Nid2        | -3.37       | 0.002714      |
|                | Nid1        | -1.58       | 0.000652      |
|                | Col8a1      | -9.65       | 0.002631      |
|                | Col12a1     | -7.79       | 0.000108      |
|                | Col1a2      | -7.47       | 0.000010      |
|                | Col3a1      | -4.35       | 0.000293      |
|                | Col1a1      | -3.90       | 0.000268      |
|                | Col5a2      | -3.23       | 0.000345      |
|                | Col4a1      | -2.39       | 0.000551      |
|                | Col4a2      | -2.14       | 0.000920      |
|                | Col5a1      | -2.12       | 0.000001      |
|                | Col14a1     | -1.95       | 0.017937      |
|                | Col6a3      | -1.88       | 0.021628      |
| Col6a2         | -1.56       | 0.007514    |               |
| Fn1            | -7.89       | 0.000032    |               |
| integrins      | Itga2       | -2.54       | 0.005192      |
|                | Itga9       | -2.12       | 0.027800      |
|                | Itga5       | -1.96       | 0.000357      |
|                | Itga6       | -1.72       | 0.027102      |
|                | Itga3       | -1.50       | 0.010345      |
|                | Itgb1       | -1.48       | 0.000374      |
|                | Itga1       | -1.29       | 0.004938      |
|                | Itga4       | -1.24       | 0.024648      |
|                | Itgax       | 2.18        | 0.011056      |
|                | Itgb2       | 2.34        | 0.003577      |
|                | Itgb8       | 4.88        | 0.001907      |

**Supplemental Table S4: Gene ontology (GO) term analysis with regard to biological processes of significantly up or downregulated genes in HSC obtained by microarray.** (see separate Excel file “Supplemental Table S5”)

**Supplemental Table S5: Differential expression of markers associated with quiescence or activation in HSC from aging rats.** The gene expression of HSC isolated from young (2 months) and old (22 months) rat livers was investigated by Affymetrix microarrays (n = 3 for each group). Negative fold change implicates lower expression while positive values indicate higher expression in HSC from old rats. The quiescent-associated markers Sparcl1, Ppary, and reelin as well as activation-associated markers fibronectin, periostin, nestin, and desmin were significantly downregulated in HSC from old rats ( $p < 0.05$ ), while Gfap and  $\alpha$ -Sma remained unchanged on mRNA level in array analysis.

| Process                                | Gene Symbol           | Fold Change | ANOVA p-value |
|----------------------------------------|-----------------------|-------------|---------------|
| HSC quiescence / activation-associated | fibronectin           | -7.89       | 0.000032      |
|                                        | nestin                | -2.96       | 0.008251      |
|                                        | Sparcl1               | -2.84       | 0.000004      |
|                                        | desmin                | -2.22       | 0.002086      |
|                                        | periostin             | -2.18       | 0.002297      |
|                                        | Ppary                 | -1.60       | 0.024991      |
|                                        | reelin                | -1.47       | 0.007415      |
|                                        | $\alpha$ -Sma (Acta2) | 1.04        | 0.666481      |
|                                        | Gfap                  | 1.20        | 0.098913      |

**Supplemental Table S6: Differential expression of markers associated with SASP in HSC from aging rats.** The gene expression of HSC isolated from young (2 months) and old (22 months) rat livers was investigated by Affymetrix microarrays (n = 3 for each group). Negative fold change implicates lower expression while positive values indicate higher expression in HSC from old rats (p < 0.05). Many genes associated with SASP exhibited altered expression in HSC from old rats, when compared to HSC from young rats. The expression of many growth factors declined, but inflammation- and cell migration-associated genes exhibited elevated expression in array analysis.

| Process                                          | Gene Symbol | Fold Change | ANOVA p-value |
|--------------------------------------------------|-------------|-------------|---------------|
| Senescence-associated secretory phenotype (SASP) | Tgfb3       | -4.87       | 0.00547       |
|                                                  | Tgfb2       | -3.02       | 0.00121       |
|                                                  | Timp2       | -2.70       | 0.00015       |
|                                                  | Tgfb1       | -2.16       | 0.00033       |
|                                                  | Fgf2        | -1.75       | 0.00054       |
|                                                  | Ctgf        | -1.72       | 0.00012       |
|                                                  | Hgf         | -1.68       | 0.03020       |
|                                                  | Il15        | -1.64       | 0.02986       |
|                                                  | Igfbp7      | -1.10       | 0.00747       |
|                                                  | Adipoq      | -1.10       | 0.03161       |
|                                                  | Ccl26       | -1.06       | 0.04205       |
|                                                  | Cxcl3       | 1.33        | 0.00091       |
|                                                  | Il6st       | 1.46        | 0.00021       |
|                                                  | Icam1       | 1.49        | 0.00853       |
|                                                  | Ccl2        | 1.50        | 0.02335       |
|                                                  | Cxcl12      | 1.56        | 0.02179       |
|                                                  | Ctsb        | 1.56        | 0.00038       |
|                                                  | Icam2       | 1.64        | 0.01713       |
|                                                  | Tnfrsf1a    | 1.65        | 0.00060       |
|                                                  | Tnfrsf1b    | 1.76        | 0.00376       |
|                                                  | Ngf         | 1.91        | 0.00096       |
|                                                  | Cxcl10      | 1.93        | 0.00122       |
|                                                  | Cxcl9       | 1.93        | 0.02212       |
|                                                  | Ereg        | 2.09        | 0.00989       |
|                                                  | Cxcl5       | 2.28        | 0.00099       |
|                                                  | Cxcl1       | 3.70        | 0.00050       |
|                                                  | Il6         | 4.01        | 0.01542       |
|                                                  | Ccl20       | 4.57        | 0.00833       |
|                                                  | Cxcl13      | 7.75        | 0.00124       |
|                                                  | Serpib2     | 7.90        | 0.05005       |
|                                                  | Csf2        | 8.87        | 0.00458       |
|                                                  | Cxcr4       | 10.15       | 0.00076       |
|                                                  | Cxcl2       | 10.16       | 0.00308       |
|                                                  | Il1a        | 14.13       | 0.00098       |
| Csf3                                             | 23.86       | 0.00169     |               |

**Supplemental Table S7: CRISPR/Cas9 target sequences for *Itga5* and *Itgb1* genes.**

| Gene         | gRNA no. | Target sequence         |
|--------------|----------|-------------------------|
| <i>Itga5</i> | gRNA 1   | GGGCTTCAACCTAGACGCGGAGG |
|              | gRNA 2   | CTCCGTGGAGTTTTACCGGCCGG |
| <i>Itgb1</i> | gRNA 3   | GTTGGTCAGCAGCGCATATCTGG |

**Supplemental Table S8: Primer sets for qPCR analysis.**

| Gene            | Accession no. | Forward primer         | Reverse primer         |
|-----------------|---------------|------------------------|------------------------|
| $\alpha$ -Sma   | NM_031004     | GCACTACCATGTACCCAGGCA  | TGCGTTCTGGAGGAGCAATA   |
| <i>Col1a2</i>   | NM_053356     | ACCTCAGGGTGTTC AAGGTG  | GGGATTCCAATAGGACCAGA   |
| <i>Col4a1</i>   | NM_001135009  | GTCCTCACTGTGGATTGGCTA  | AGTAATTGCACGTTCTCTGC   |
| <i>Col6a6</i> * | XM_017596190  | TTGCCCAAACATGACACAG    | TCTAGGTTCTCTGGCTGCC    |
| <i>desmin</i>   | NM_02253      | ACCTCCGATCCAGACCTTCT   | TTCATGTTGTTGCTGTGTGGC  |
| <i>Eln</i>      | NM_012722     | GTGGCTATGGACTGCCCTATAC | CCTCCAGCAGCTCCATACTTAG |
| <i>Fn</i>       | NM_019143     | ATGTTGGAGTGTGGTGTCTGG  | GTGTCCTGATCATTGCATCTGT |
| <i>Gfap</i>     | NM_017009     | ACATCGAGATCGCCACCTAC   | TCCACCGTCTTACCACGAT    |
| <i>Hgf</i>      | NM_017017     | CGAGCTATCGCGGTAAAGAC   | TGTAGCTTTCACCGTTGCAG   |
| <i>Hprt1</i>    | NM_012583     | AAGTGTGGATACAGGCCAGA   | GGCTTTGACTTGGCTTTTCC   |
| <i>Ilf6</i>     | NM_012589     | TACCCAACTTCCAATGCTC    | GGTTTGCCGAGTAGACCTCA   |
| <i>Itga1</i>    | NM_030994     | CGAGCCTCTGGCTTCTTATTT  | GATGTTCCCATCCTCCATCTT  |
| <i>Itga2</i>    | XM_001075558  | CCACAGAAGCTTCGTTCACTC  | GGTCAGCATCAAGTGCATGTT  |
| <i>Itga3</i>    | XM_006247215  | CCCTCAAGAACGATTGTGAAC  | AGACCACAGCACCTTGGTGTGA |
| <i>Itga5</i>    | NM_001108118  | CCCAAAGGAAACCTCACCTAT  | TCATCTAGCCCATCTCCATTG  |
| <i>Itga6</i>    | NM_053725     | GGCTCTTGTCAGCAAGGAGTA  | CAACTTCATAGGGCCCATCTT  |
| <i>Itga11</i>   | NM_001108156  | ACAGCATCGAGTGTGTGAATG  | ATGGATCTGAAGATGGTGCAG  |
| <i>Itgb1</i>    | NM_017022     | TTGGACACTGTTCCATGCGTA  | TTGAAGGCTCTGCACTGAACA  |
| <i>Itgb3</i>    | NM_153720     | GGCCTCAAGATTGGAGACAC   | GCAGTCACAGTCACAGTCGAA  |
| <i>Itgb4</i>    | NM_013180     | CTGCTCATCTTCCCTCTGTTG  | TCCCGCAGCATATAGTGATCT  |
| <i>Lama2</i>    | XM_017590488  | GGGACACGAACGATGAGGAAA  | TTTTCACTTCGATGGGCTGCT  |
| <i>Lama4</i>    | NM_001309447  | ACTATGTCAGTGAGGCCAACG  | CTGGCTTGATTGAGAAGGTTG  |
| <i>Lama5</i>    | NM_001191609  | CAAATGAGCATCGCCTTCTG   | CCAGCACCATCATGAGTTCTT  |
| <i>Lamb1</i>    | XM_003750137  | CGTGGACTCTGTGGAGAAGAA  | CTCCGTGAAGCTGTGTCAGAT  |
| <i>Lamb2</i>    | NM_012974     | CAGAGCTGGAATTGGTGGTG   | TGTAGGAGAGACCAGGCTCAA  |
| <i>Lamc1</i>    | NM_053966     | GCCTTTTCAACTCTGGAAGGA  | ACTTGAGGACTTTGGGGTCAT  |
| <i>Lrat</i>     | NM_022280     | GACCTACTGCAGATACGGCTC  | TATGATGCCAGGCCTGTGTAG  |
| <i>Lu/Bcam</i>  | NM_031752     | GAGGATTACGATGCTGACGAG  | ATCTGCAACGGTCACAGAATC  |
| <i>nestin</i>   | NM_001308239  | GATCGCTCAGATCCTGGAAG   | AGGTGTCTGCAACCGAGAGT   |
| <i>Nid1</i>     | XM_213954     | TGTGCCAACAATAGACACCAG  | AAGATCCTTCCCTTACCTTG   |
| <i>Nid2</i>     | NM_001012005  | ATTCACCATGGAGGCAGTTC   | CCGGGGGTATTGTAACAGATG  |
| <i>reelin</i>   | NM_080394     | CTGCAATACAGCGTCAACAAC  | CCACTGATCATGACCTGTTCC  |
| <i>Sparcl1</i>  | NM_012946     | CCTCAAATACGGAGAGGAGAC  | GTCCCCTTTTCACTGGAAGT   |

\* The primer set detects the transcript variants 1-8 of *Col6a6*.

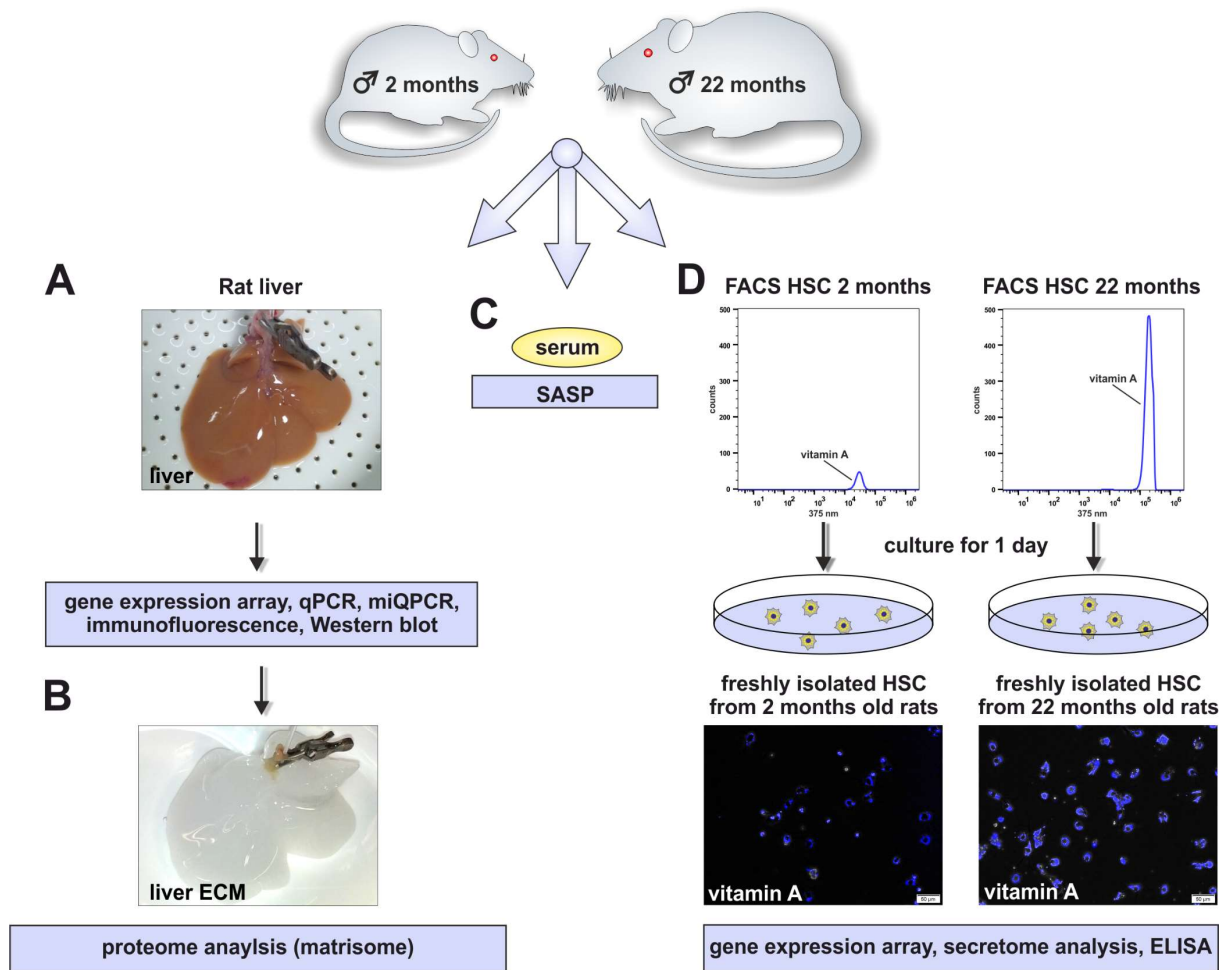

**Supplemental Figure S1: Experimental setup.** Isolated HSC and liver tissue from young (2 months) and old (22 months) rats were compared to unravel possible alterations of stellate cells and their niche during aging. **(A)** The liver tissues of young and old rats were also analyzed by microarrays (see above;  $n = 3$  for each age group). The array results were evaluated by qPCR analysis and completed by immunofluorescence as well as Western blot to identify age-related alterations in the liver ( $n = 3-10$ ). **(B)** To enable quantitative assessment of the matrisome, liver tissues from both age groups were decellularized for proteome analysis ( $n = 3$  for both age groups). **(C)** The blood serum was collected from young and old rats and analyzed regarding cytokines indicating a SASP. **(D)** HSC of both age groups were isolated and enriched by density gradient centrifugation and further purified by FACS using their characteristic vitamin A (retinoid) fluorescence. After one day of culture, the HSC showed typical cell morphology and vitamin A fluorescence (blue). The HSC from young rats contained fewer retinoids compared to those obtained from old rats. The RNA of HSC was harvested and analyzed by microarrays (Affymetrix GeneChip Rat Gene 2.0 ST Array;  $n = 3$  for each age group). The medium of the HSC was collected for protein arrays and ELISA to investigate their secretome with respect to a SASP.

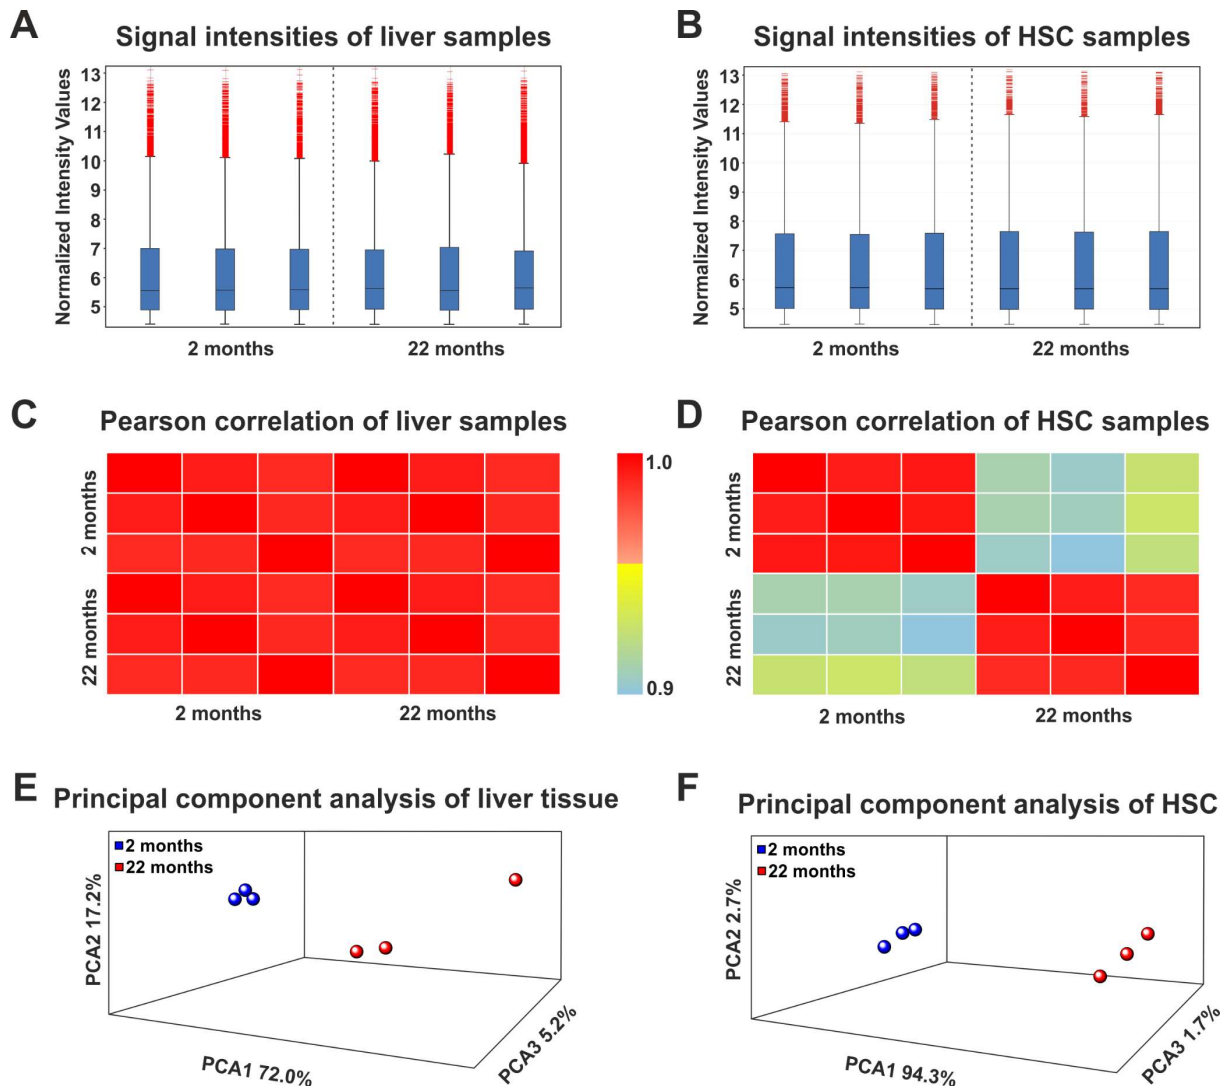

**Supplemental Figure S2: Quality control of microarray raw data.** (A, B) To evaluate the reliability of the data sets obtained by microarray analysis for liver tissue and isolated HSC (cultured for 1 day) from young (2 months) and old (22 months) rats, the signal intensities of samples on genes chips were compared. (C, D) Pearson correlation analysis of the microarray data for liver tissue and isolated HSC from both age groups was performed and revealed that the gene expression of liver samples seemed to be equal. In contrast, significant differences between HSC from young and old rats were observed when Pearson correlation was applied. (E) Gene expression data of whole liver tissue from both groups were compared by principal component analysis (PCA) and showed that the samples of young rats were highly similar and different from old rats. (F) PCA of gene expression arrays in isolated HSC from 2 (blue) and 22 (red) months old rats. HSC from young rats exhibited highly similar gene expression and were different from samples obtained from old rats, which clustered together, but exhibited a higher variation. Each dot represents a data set from a single animal ( $n = 3$  for each age group).



### Gene ontology term analysis of biological processes

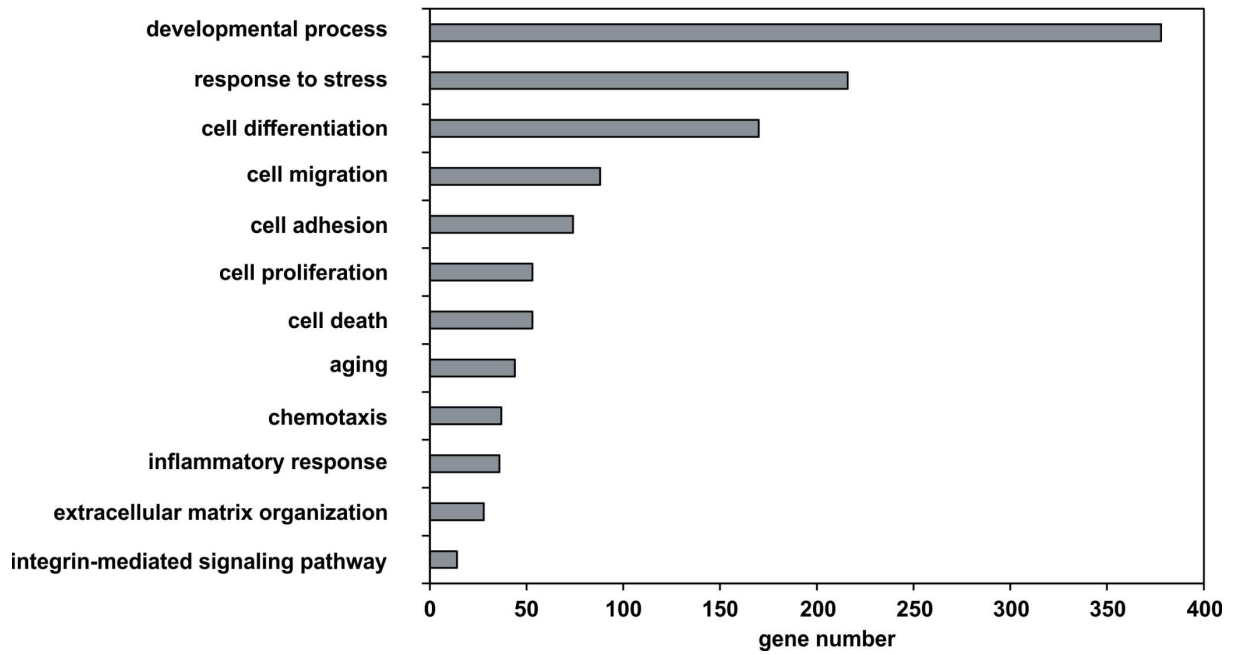

**Supplemental Figure S3: Gene ontology (GO) term analysis of differentially expressed genes in HSC from old compared to young rats with respect to biological processes.** GO term analysis of differentially expressed genes obtained by Affymetrix microarrays was performed with the software GOrilla (October 2018; fold enrichment > 1.5;  $p < 0.05$ ).

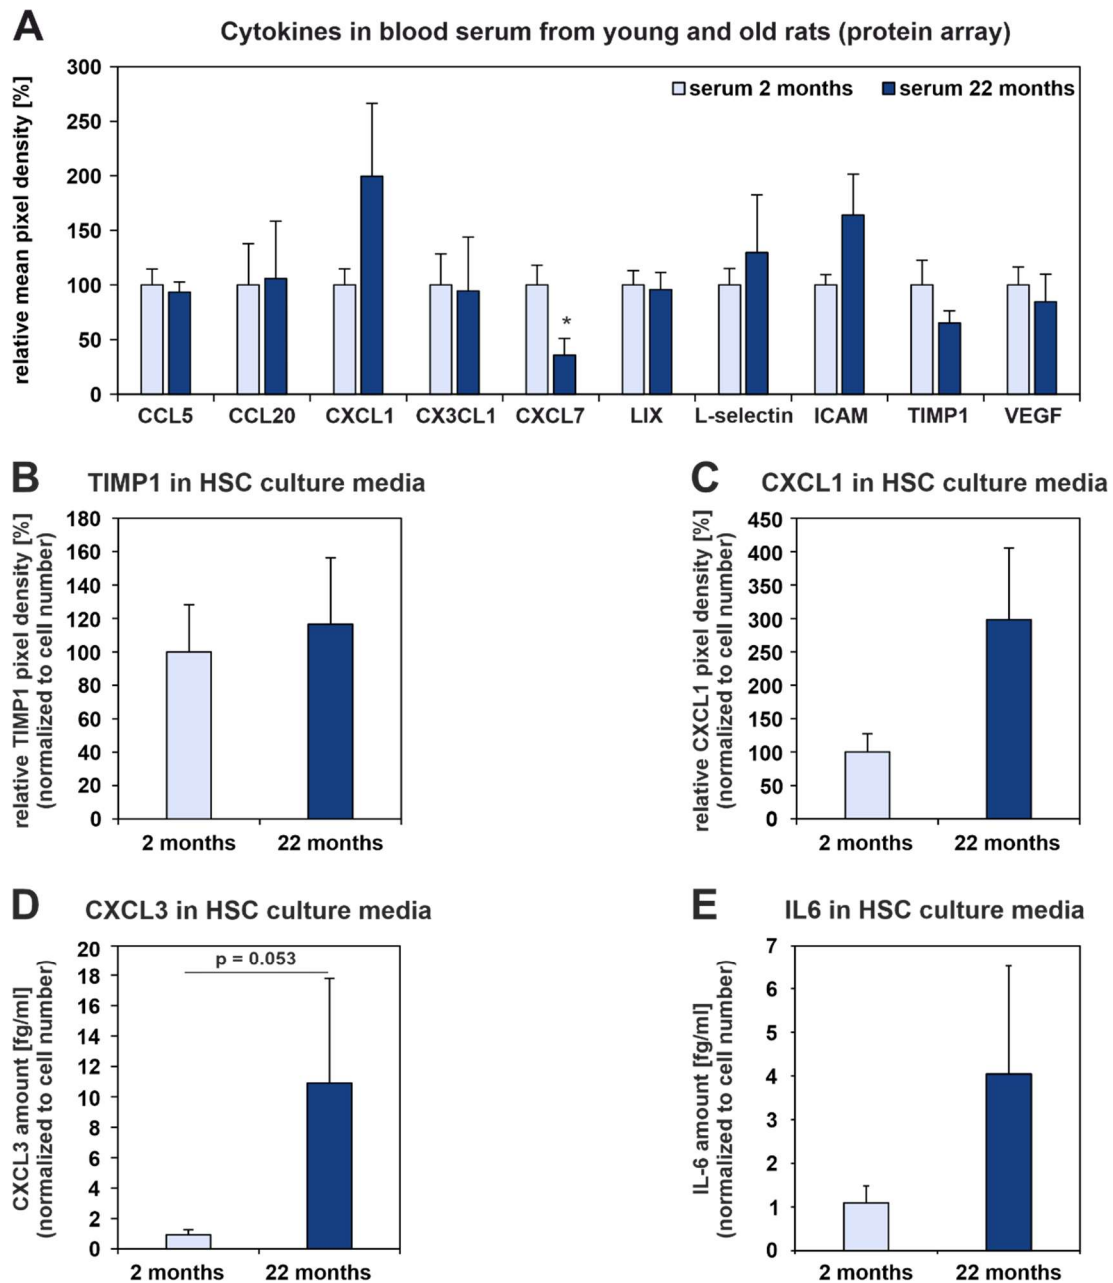

**Supplemental Figure S4: Senescence- and inflammation-associated factors in blood serum and HSC.** (A) The rat cytokine array revealed no obvious differences of cytokines in the serum of young and old rats, with the exception of CXCL7, which was significantly lower in the serum samples from 22-months-old animals. Mean pixel density of samples from 2-months-old rats was set to 100% and data are presented as means  $\pm$  SEM ( $n = 4$ ,  $*p < 0.05$ ). Cytokines released into culture medium by freshly isolated HSC from young and old rats was also analyzed. Only TIMP1 and CXCL1 were detected by the rat cytokine array in all culture supernatants. (B) TIMP1 concentration remained unchanged, (C) whereas CXCL1 increased by 3-fold in culture supernatants of HSC from old rats ( $n = 4$  for each age group). Data from young rats were set to 100%. (D) Analysis of CXCL3 by ELISA revealed a 10-fold increase in CXCL3 concentration in HSC culture media from old rats. (E) IL6 concentration in culture supernatants of HSC from old rats increased by 4-fold compared to young rats as analyzed by ELISA. Cytokine array and ELISA data were normalized to cell number. The data are presented as means  $\pm$  SEM (cytokine arrays:  $n = 3$ ; ELISA:  $n = 5$  for 2-months and  $n = 3$  for 22-months-old rats;  $*p < 0.05$ ).

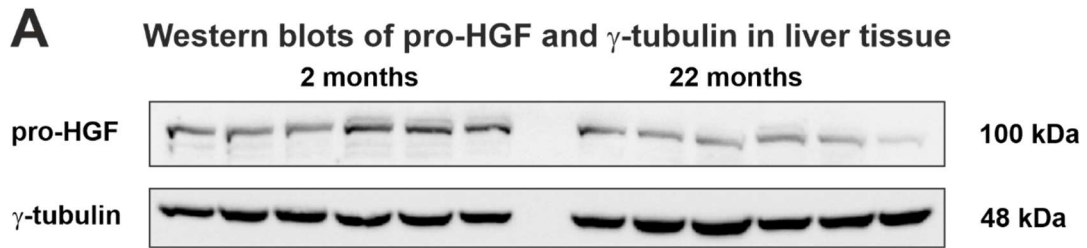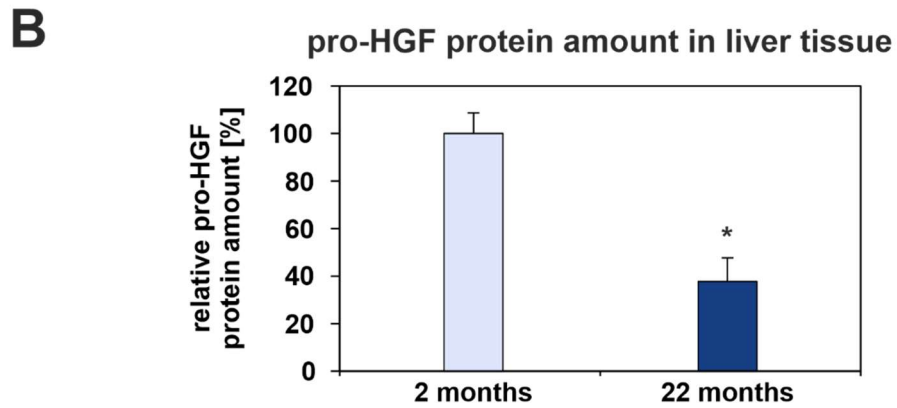

**Supplemental Figure S5: Pro-HGF in rat liver tissue during aging. (G)** Representative Western blot of pro-HGF in liver tissue from 2-months and 22-months-old rats.  $\gamma$ -Tubulin was used as loading control. **(H)** Western blot analyses of liver tissue from young and old rats revealed age-related significantly reduced pro-HGF amounts (n = 6 for each age group; \* p < 0.05).

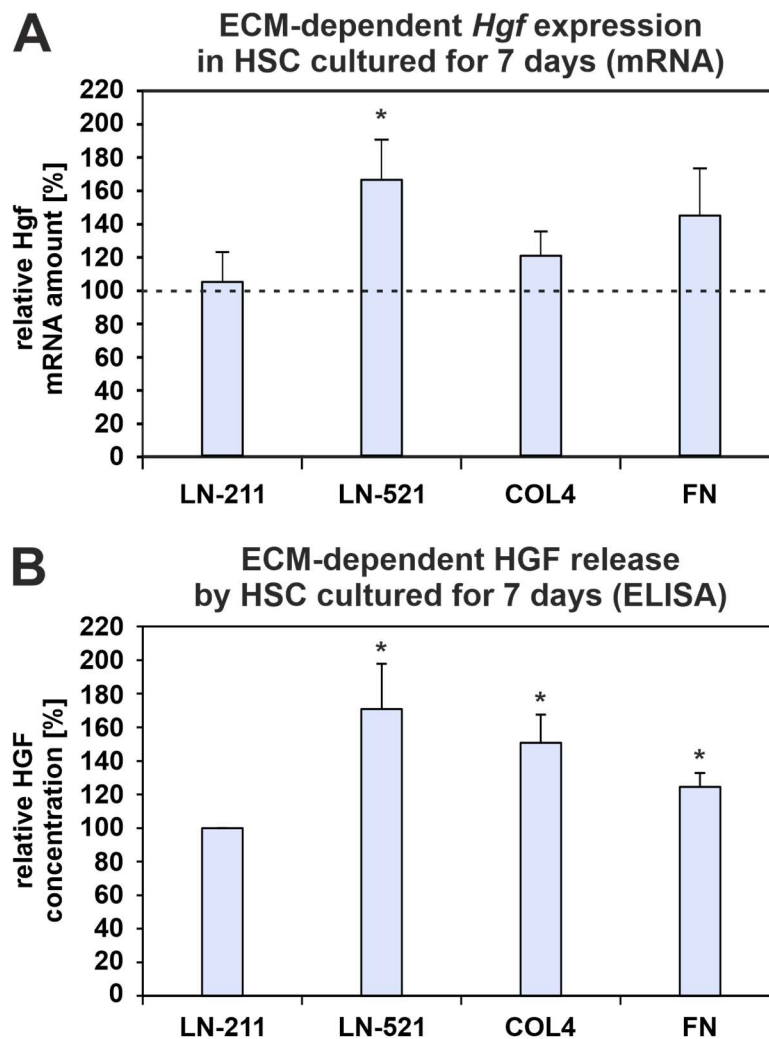

**Supplemental Figure S6: Influence of ECM proteins on HGF expression and release by HSC.** (A) Expression of *Hgf* in HSC was dependent on the ECM protein used for coating of culture dishes. HSC were cultured for 7 days under serum-free conditions on uncoated or ECM protein-coated (LN-211, LN-521, COL4, or FN) culture dishes. The mRNA expression of HSC cultured for one week on uncoated polystyrene dishes was set to 100% (broken line) for each experiment. The data are indicated as means  $\pm$  SEM ( $n = 4-8$ ;  $*p < 0.05$ ). (B) HGF release by HSC from mid-aged rats cultured for one week on different ECM protein-coated surfaces was analyzed by ELISA and revealed that cells on LN-521, COL4, and FN released significantly more HGF than HSC cultured on LN-211. The HGF concentration measured for HSC on LN-211 was set to 100% for each independent experiment. The data are presented as means  $\pm$  SEM ( $n = 4$ ,  $*p < 0.05$ ).
